# Supplementary material for: Perpendicularly aligned carbon nanotube/olefin composite films for the preparation of graphene nanomaterials
Source: Royal Society of Chemistry journal article supplement (doi:10.1039/c2jm33009a), 2012-01-01
Supplement: c2jm33009a.pdf [file c2jm33009a.pdf]

## Supporting Information

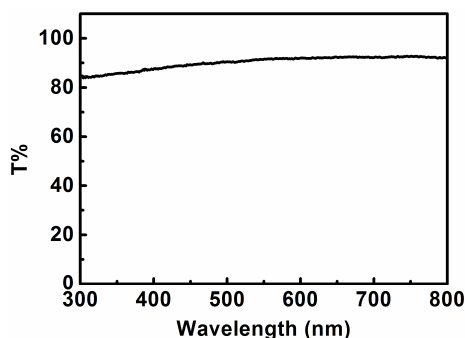

**Figure S1.** Transmittance characterization of an aligned CNT/olefin composite film with thickness of 100 nm by UV-vis spectroscopy.

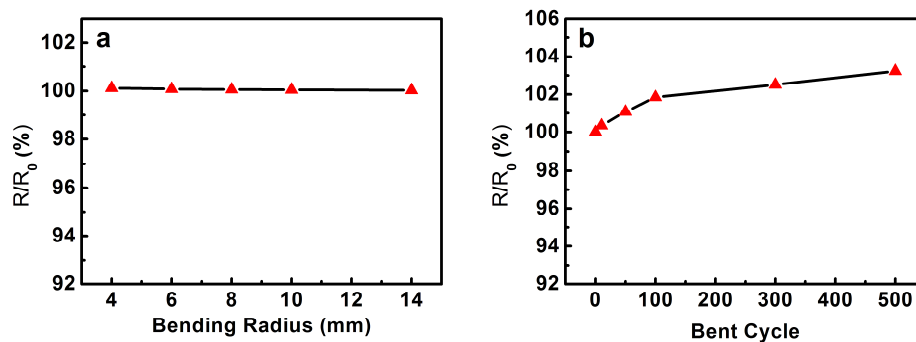

**Figure S2.** Electrical resistances of an aligned CNT/olefin composite film under bending. In a typical test, silver paint was coated at the top and bottom surfaces of composite film, followed by connection to two wire electrodes of an Agilent 34401A digital multimeter. Here  $R_0$  and  $R$  correspond to electrical resistances in the normal direction of the film before and after bending, respectively. One bent cycle means that a film is bent to  $180^\circ$  (with a radius of 4 mm at the bending part) and then recovered to the original state.

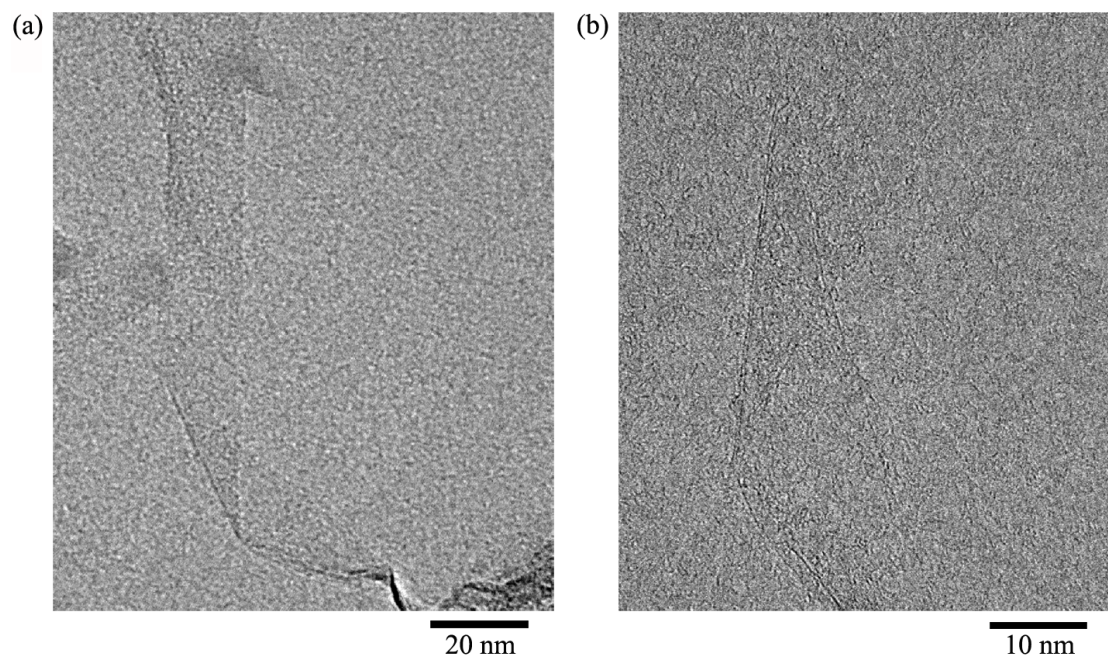

**Figure S3.** High resolution transmission electron microscopy (TEM) images of two nanosheets with a kink structure.

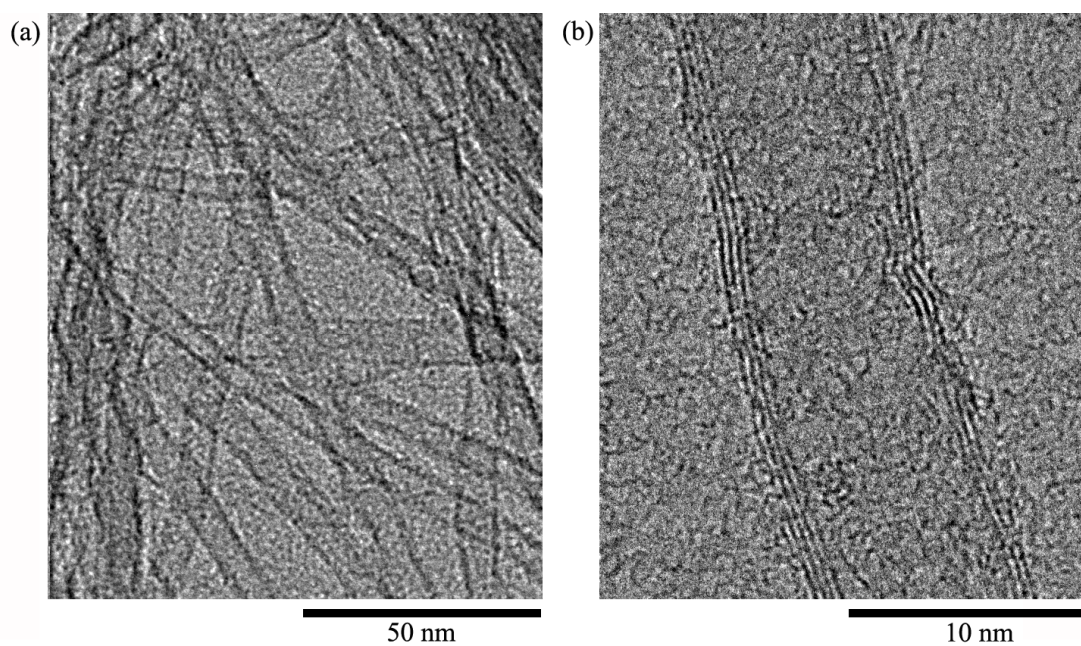

**Figure S4.** High resolution TEM image of the heat-treated CNTs which had not been sliced after ultrasonic treatment.

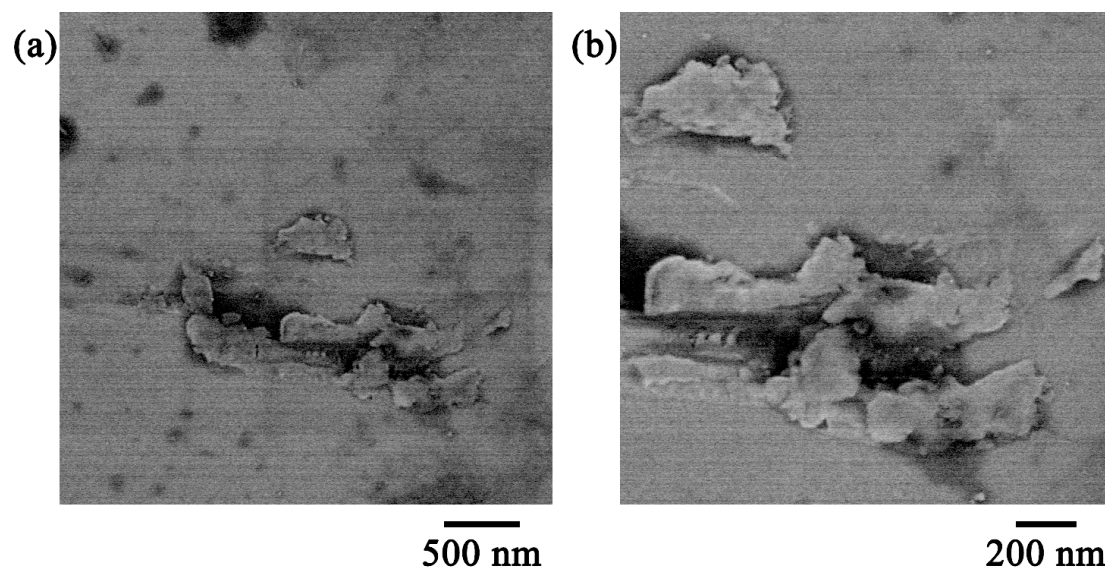

**Figure S5.** SEM image of the resulting product after an ultrasonic treatment of CNTs. (a) low magnification. (b) high magnification, gold powder had been sprayed on the sample for 20 s before the SEM characterization.

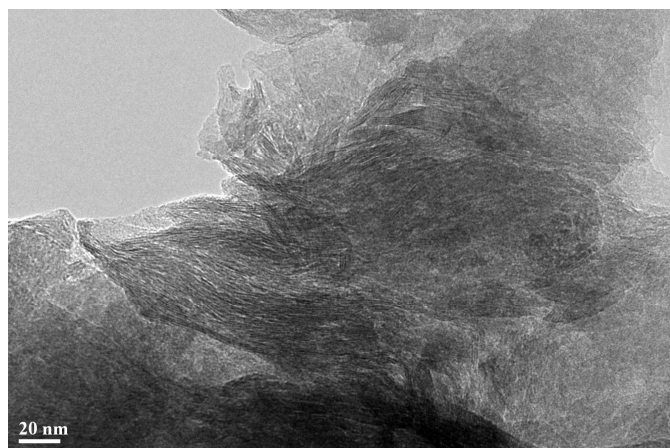

**Figure S6.** TEM image of the resulting product after an ultrasonic treatment of CNTs.

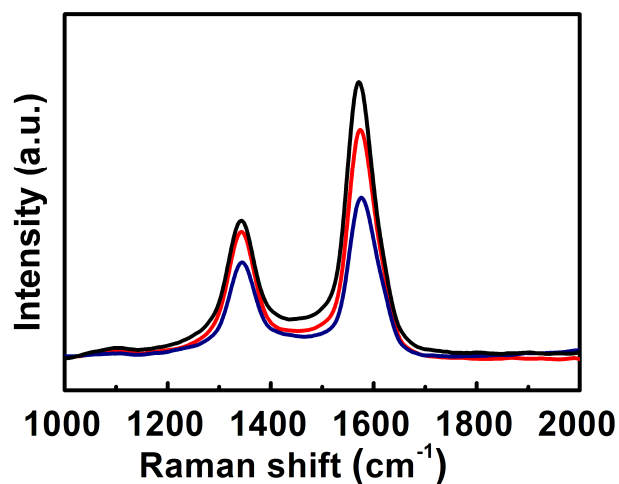

**Figure S7.** Raman spectra of as-synthesized CNTs (black line), CNTs after cutting (red line), and the resulting nanosheets (blue line).

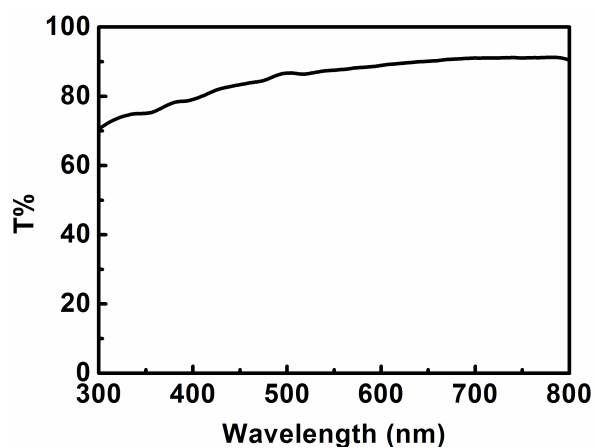

**Figure S8.** Transmittance characterization of a nanosheet film with thickness of 40 nm by UV-vis spectroscopy. The film was prepared by spincoating graphene nanosheet solution in ethanol (0.005 mg/ml).
